# Supplementary material
Source: PubMed Central journal article supplement (PMC4458379)
Supplement: NIHMS62968-supplement-1.pdf [file NIHMS62968-supplement-1.pdf]

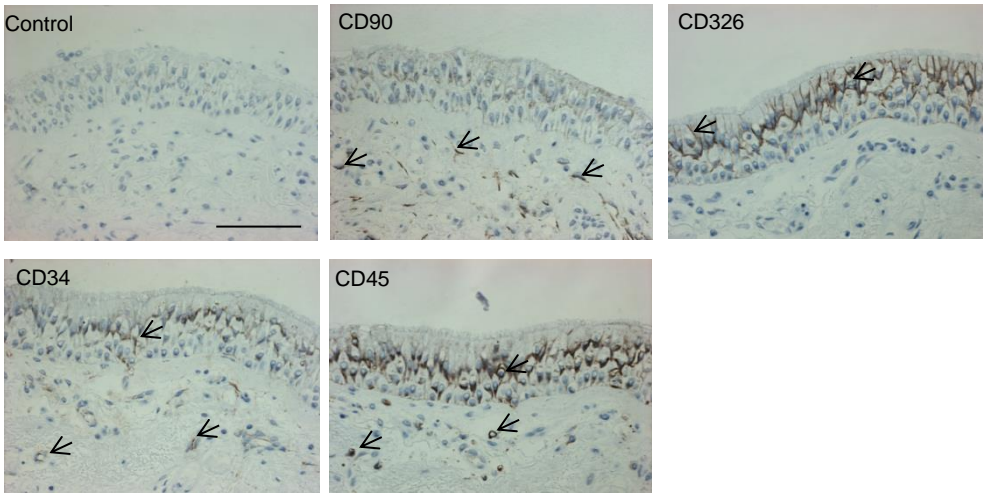

Figure S1 -Immunohistochemical confirmation of monoclonal antibody targets directed against structural and leukocyte cell targets in bronchial explants. GMA embedded bronchial biopsies were cut into 2 $\mu$ m sections and stained using the same monoclonal antibody clones as used for subsequent flow cytometry, directed against fibroblasts (CD90/Thy1, BD clone 5E10), Epithelial cells (EpCAM/CD326, BD clone EBA-1), endothelial cells (CD34, BD clone 8G12) and leukocytes (CD45, Invitrogen clone H130). Detection antibodies were indirectly detected using peroxidase-labelled secondary antibodies and labelled antibodies visualised using DAB stain. Specific immunoreactivity is visible as a brown colouration, haematoxylin counterstain is blue. Size bar indicates 100 $\mu$ m.

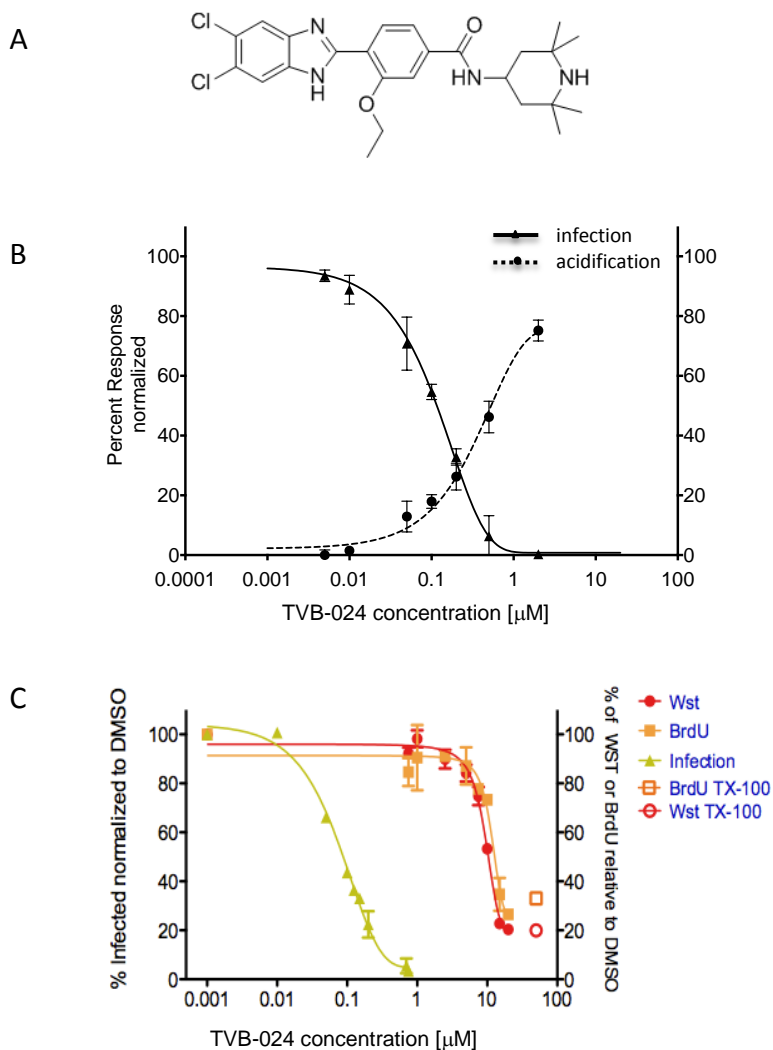

Figure S2 –vATPase inhibitor TVB024 structure and effects on endosomal acidification and cell viability. A) The structure of the TVB024 molecule is based on the indol series of bafilomycin-derived vATPase inhibitors. B) Monolayer cultures of A549 cells were pre-incubated with the TVB024 inhibitor for 2 h prior to infection with X31 influenza for 15h. Cell infection was measured by direct immunofluorescence with a monoclonal antibody directed against the viral NP protein. Infection rates were quantified using image analysis software and expressed on the left y-axis as the % of total cells infected with the virus (green triangles). Viral infection decreased with increasing TVB024 concentration, with full inhibition achieved at 0.5 $\mu\text{M}$ . Endosomal acidification measured by acridine orange assay (described in Method section) and expressed as % inhibition, was progressively inhibited by increasing concentrations of TVB024. C) Cellular toxicity induced by the compound was measured by quantifying the loss of cell-associated viability markers BrdU and also water soluble tetrazolium salts (WST) (orange squares and red circles respectively) and expressed as a percentage of DMSO carrier-treated controls. Triton X-100 detergent lysis was used as a 100% toxicity control for the loss of viability and are included on the graph as single data points. Cell toxicity was detected only at concentrations exceeding 5 $\mu\text{M}$ , and increased in a concentration-dependent manner. The window of non-toxic maximal efficacy of TVB024 in A549 cells was, therefore, at least one full log scale. Data are mean values from two experiments performed in triplicate, +/- S.D.

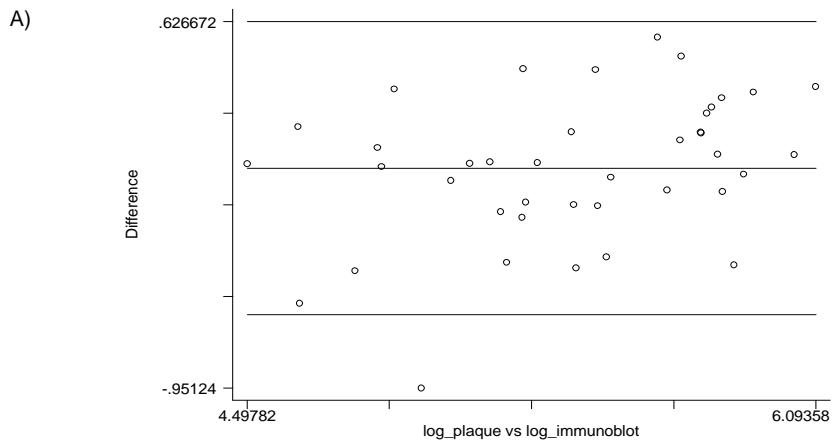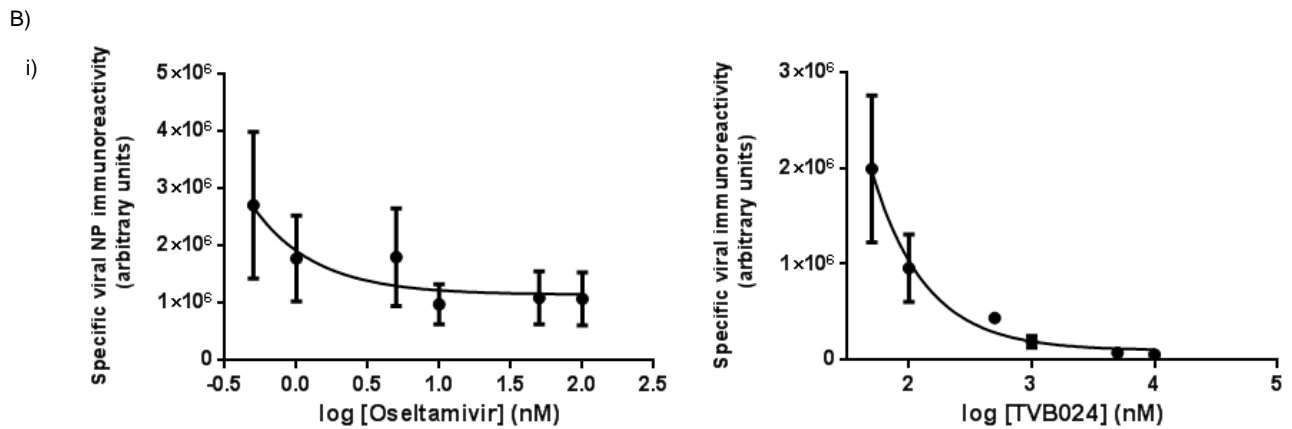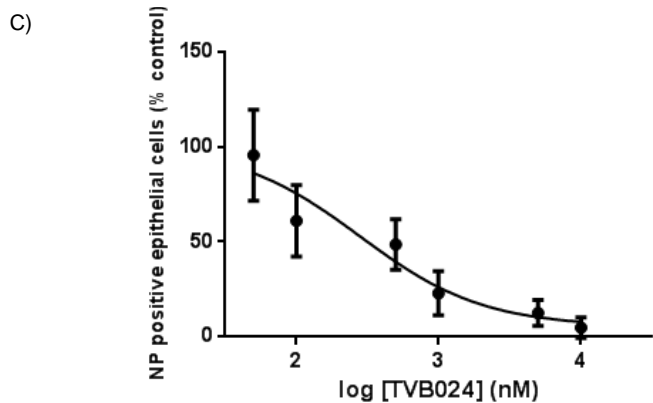

Figure S3 – Validation of viral shedding immunoassay, and dose response curves of anti-viral agents. A) Demonstration of parity in quantitation of viral shedding from influenza-infected lung tissues using MDCK plaque assay, and dot blot immunoassay using polyclonal anti-influenza antibody. Conditioned media samples from bronchial tissues collected 24 h post-infection were analysed by the two methods as described in Materials and Methods. Data were analysed using Bland-Altman comparison of the difference between the two measurements after  $\log_{10}$  transformation of the data, showing good agreement between the two methods. B) Dose-response of Oseltamivir and TVB024 inhibition of influenza infection. Lung parenchymal tissue from surgical resections was cultured *ex vivo* as described in the Material and Methods, and pre-treated for 2 h with varying doses of oseltamivir (100-0nM) or TVB024 (10-0 $\mu$ M). Tissue was then infected with log 7.4 infectious unit dose (IUD) A/H3N2/Wisconsin/68/2005 virus for 2 h. The tissue was incubated for a further 48 h in the presence of the inhibitors. Conditioned medium was analysed for viral release into the culture media by immunoblot and results expressed as arbitrary units; this demonstrated a dose-dependent reduction in viral release from infected tissue for both inhibitors. However, whereas TVB024 reduced release to baseline (ii), oseltamivir only reduced it by approximately 50% (i). The  $IC_{50}$  for TVB024 and Oseltamivir were 88.3nM and 5nM respectively. The tissue was enzymatically dispersed in order to stain epithelial cells for influenza infection and analysis by flow cytometry (C); this showed that TVB024 reduced infection to baseline in a dose-dependent manner, mirroring the viral release patterns. Data are mean values from three experiments performed in triplicate, +/- S.E.M.

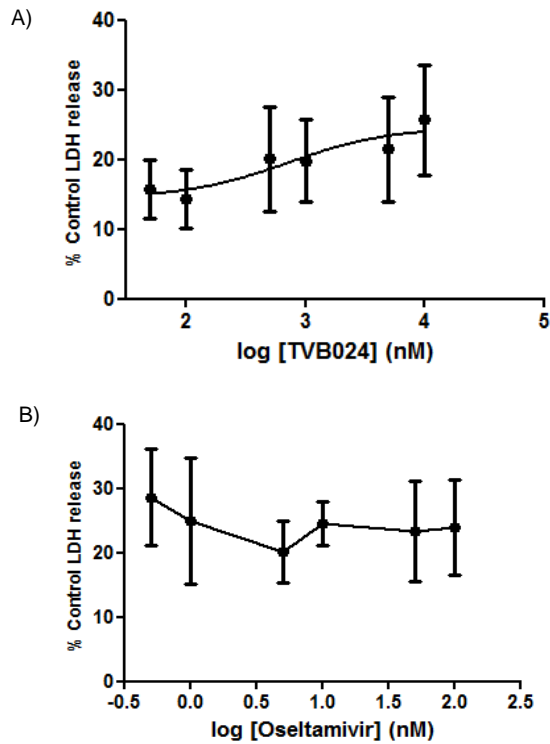

Figure S4 –Dose-response of Oseltamivir and TVB024, effect on LDH release into culture medium as a measure of cytotoxicity. Lung parenchymal tissue from surgical resections was cultured *ex vivo* as described in the Material and Methods, and pre-treated for 2 h with varying doses of oseltamivir (100-0nM) or TVB024 (10-0 $\mu$ M). Tissues were mock infected with virus diluent and then incubated in culture medium for a further 48 h. Culture medium samples were centrifuged at 400g to remove cellular material, and then assayed for LDH concentration using a non-radioactive LDH assay kit (Promega) according to the manufacturer's instructions. Positive control samples (100% LDH) were generated by homogenising tissue samples in culture medium. Data are expressed as mean percentage of positive control LDH values  $\pm$  S.E.M from three experiments performed in triplicate. No significant alteration in LDH release above baseline values was detected following drug treatments using these inhibitor concentrations.
